# Supplementary material for: Effectiveness of eHealth interventions for the promotion of physical activity in older adults: a systematic review protocol
Source: Springer Nature journal article supplement (doi:10.1186/s13643-016-0223-7), 2016-03-16
Supplement: MOESM2 [file 9787772]

## Additional file 2: Medline search.

### Medline search (via PubMed, 30<sup>th</sup> October 2015)

#### Physical activity

| Search name | Search query                                                                                                                                                                                                                                                                                                                                                                                                                                                                                                                           | Type of search | Results |
|-------------|----------------------------------------------------------------------------------------------------------------------------------------------------------------------------------------------------------------------------------------------------------------------------------------------------------------------------------------------------------------------------------------------------------------------------------------------------------------------------------------------------------------------------------------|----------------|---------|
| #1          | physical education and training[MeSH Terms] OR sports[MeSH Terms] OR exercise[MeSH Terms] OR physical fitness[MeSH Terms] OR exercise therapy[MeSH Terms] OR motor activity[MeSH Terms]                                                                                                                                                                                                                                                                                                                                                | MeSH terms     | 305,405 |
| #2          | sedentary behavio*[Title/Abstract] OR physical activi*[Title/Abstract] OR physical inactivi*[Title/Abstract] OR sport*[Title/Abstract] OR exercis*[Title/Abstract] OR muscle stretching exercise*[Title/Abstract] OR resistance training[Title/Abstract] OR walk*[Title/Abstract] OR bicycle*[Title/Abstract] OR cycling[Title/Abstract] OR swim*[Title/Abstract] OR running*[Title/Abstract] OR gymnastic*[Title/Abstract] OR yoga[Title/Abstract] OR dancing[Title/Abstract] OR pilates[Title/Abstract] OR gardening[Title/Abstract] | Keyword TI/AB  | 480,553 |
| #3          | #1 OR #2                                                                                                                                                                                                                                                                                                                                                                                                                                                                                                                               |                | 619,588 |

#### EHealth

| Search name | Search query                                                                                                                                                                                                                                                                                        | Type of search | Results |
|-------------|-----------------------------------------------------------------------------------------------------------------------------------------------------------------------------------------------------------------------------------------------------------------------------------------------------|----------------|---------|
| #4          | telemedicine[MeSH Terms] OR computer-assisted instruction[MeSH Terms] OR multimedia[MeSH Terms] OR computer systems[MeSH Terms] OR computers[MeSH Terms] OR cd-rom[MeSH Terms] OR electronic mail[MeSH Terms] OR cell phones[MeSH Terms] OR mobile applications[MeSH Terms] OR internet[MeSH Terms] | MeSH terms     | 168,712 |
| #5          | compute*[Title/Abstract] OR web*[Title/Abstract] OR online[Title/Abstract]                                                                                                                                                                                                                          | Keyword TI/AB  | 620,413 |
| #6          | #4 OR #5                                                                                                                                                                                                                                                                                            |                | 718,731 |

#### Older adults

| Search name | Search query                                                                                                            | Type of search | Results   |
|-------------|-------------------------------------------------------------------------------------------------------------------------|----------------|-----------|
| #7          | aged[MeSH Terms]                                                                                                        | MeSH terms     | 2,460,407 |
| #8          | elder*[Title/Abstract] OR older people[Title/Abstract] OR older adult*[Title/Abstract] OR old adult*[Title/Abstract] OR | Keyword TI/AB  | 295,730   |

|    |                                                                                                                                                                                                                                                                       |  |           |
|----|-----------------------------------------------------------------------------------------------------------------------------------------------------------------------------------------------------------------------------------------------------------------------|--|-----------|
|    | older person*[Title/Abstract] OR old person*[Title/Abstract]<br>OR aging adult*[Title/Abstract] OR aging<br>person*[Title/Abstract] OR ageing adult*[Title/Abstract] OR<br>ageing person*[Title/Abstract] OR geriatrics[Title/Abstract]<br>OR senior*[Title/Abstract] |  |           |
| #9 | #7 OR #8                                                                                                                                                                                                                                                              |  | 2,561,541 |

RCT-Filter: sensitivity-maximizing version [26]

| Search name | Search query                                         | Results   |
|-------------|------------------------------------------------------|-----------|
| #10         | randomized controlled trial[pt]                      | 398,286   |
| #11         | controlled clinical trial[pt]                        | 89,554    |
| #12         | randomized[tiab]                                     | 358,994   |
| #13         | placebo[tiab]                                        | 170,382   |
| #14         | drug therapy[sh]                                     | 1,790,185 |
| #15         | randomly[tiab]                                       | 241,572   |
| #16         | trial[tiab]                                          | 409,061   |
| #17         | groups[tiab]                                         | 1,538,383 |
| #18         | #10 OR #11 OR #12 OR #13 OR #14 OR #15 OR #16 OR #17 | 3,679,368 |
| #19         | animals[mh] NOT humans[mh]                           | 4,056,964 |
| #20         | #18 NOT #19                                          | 3,172,158 |

Summary and results

| Search name | Search query                                      | Results |
|-------------|---------------------------------------------------|---------|
| #21         | #3 AND #6 AND #9                                  | 4,729   |
| #22         | #3 AND #6 AND #9 AND #20                          | 1,703   |
| #23         | #3 AND #6 AND #9 AND #20 Filters: English, German | 1,622   |
